# Supplementary material
Source: Springer Nature journal article supplement (https://www.springermedizin.de/resource/supplementary/12876_2010_441_MOESM4_ESM.pdf/9437020)

578908  
Name :

Sex : Age :  
D.O.Birth :

02 21 2008  
09:28:26

SCV:55

Ct: N Ep: H  
Ce: 1

Physician :  
Comment :

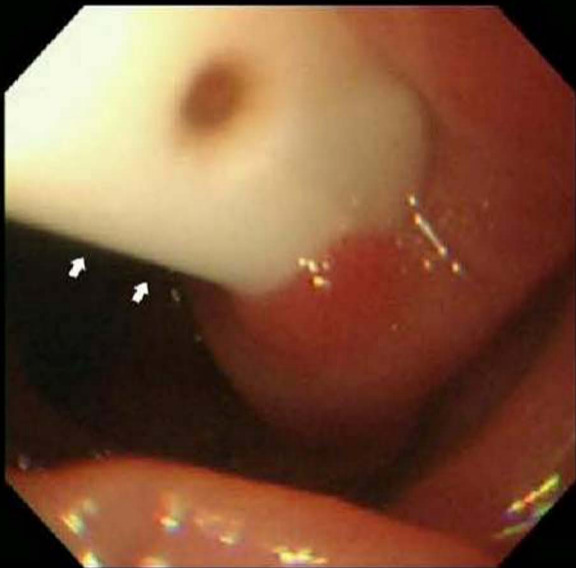

578908  
Name :

Sex : Age :  
D.O.Birth :

02 21 2008  
09:30:03

SCV:55

Ct: N Ep: H  
Ce: 1

Physician :  
Comment :

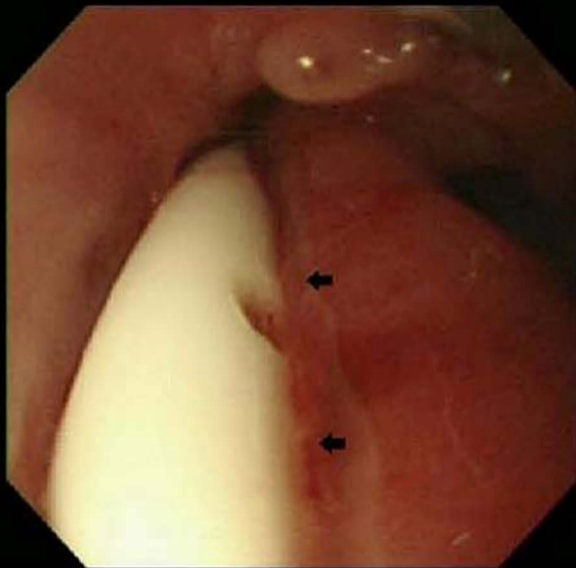

Supplement: MOESM4 [file 9437020]
